# Supplementary material
Source: publisher site journal article supplement (https://www.dovepress.com/article/279645)

**Supplementary Materials for the study:**

**Validation of the Summit Lab Score in Predicting Exacerbations of Chronic Obstructive Pulmonary Disease Among Individuals With High Arterial Stiffness**

*Benjamin D. Horne, PhD, MStat, MPH1,2; Rehan Ali, MSc*3*; Dawn Midwinter, MSc*3*; Catherine Scott-Wilson, BA*4*; Courtney Crim, MD*4*; Bruce E. Miller, PhD*5*; David B. Rubin, MD*4*

**Affiliations:** 1Intermountain Medical Center Heart Institute, Salt Lake City, Utah, USA; 2Division of Cardiovascular Medicine, Department of Medicine, Stanford University, Stanford, CA, USA; 3GlaxoSmithKline plc., Stockley Park, Uxbridge, UK; 4GlaxoSmithKline plc., Research Triangle Park, Raleigh, North Carolina, USA; 5GlaxoSmithKline plc., Collegeville, Pennsylvania, USA.

*At the time of manuscript development; no longer affiliated with GlaxoSmithKline plc.

**Supplemental Methods**

The Summit Lab Score was calculated using previously-derived models using the following variables: baseline body mass index, number of pack years of smoking history, number of prior COPD hospitalizations, baseline FEV1, baseline heart rate, baseline systolic blood pressure, history of prior MI, prior HF diagnosis, prior diabetes diagnosis, age at baseline, and baseline prescription of antithrombotics, antiarrhythmics, and xanthines. Further details are available in the derivation publication.14 IMRS was also previously derived and repeatedly validated using sex-specific models with the following predictors: baseline age, baseline complete blood count parameters (i.e., hematocrit, white blood cell count, platelet count, MCV, RDW, mean corpuscular hemoglobin concentration, and mean platelet volume), and baseline basic metabolic profile (i.e., sodium, potassium, calcium, bicarbonate, glucose, and creatinine).13 A free online calculator is available for use to compute IMRS and a combined calculator to compute the Summit Score or the Summit Lab Score, which can be found by clicking on the “Summit Risk Score Calculator” button on this website: <https://intermountainhealthcare.org/about/transforming-healthcare/innovation/intermountain-risk-scores/>.

**Supplemental Results**

When patients were grouped by tertiles of IMRS, Kaplan−Meier rates of freedom from moderate-to-severe AECOPD were 92.9%, 91.2%, and 88.3% for tertiles 1, 2, and 3, respectively (*P* trend = 0.141) (Supplemental Figure S1). The HR for each tertile was 1.35 (0.90, 2.00) and the HR of tertile 3 vs tertile 1 and tertile 2 combined was not statistically significant (HR 1.48; 95% CI: 0.80, 2.75; *P* = 0.21). Likewise, the respective rates of freedom from a first CV event were 96.1%, 93.9%, and 94.2% (*P* trend = 0.42) (Supplemental Figure S2); with a HR of 1.23 (95% CI: 0.74, 2.07) per tertile.

Supplemental Table S1. LIST OF INVESTIGATORS AND IECS/IRBS FOR HZC113108

| **Investigator** | **Description of Research Facility, Hospital/ Institution, and Address** |
| --- | --- |
| **Germany** |  |
| Eich, Andreas. Dr. med.* | Institut fuer klinische Forschung Pneumologie GmbH & Co. KG, Stresemannallee3, Frankfurt, Hessen, 60596, Germany |
| Hagenow, Andreas. Dr. med | Zentrum fuer Klinische Studien, Suedbrandenburg GmbH, Ross Strasse 5, Elsterwerda, Brandenburg, 049140, Germany |
| Heymer, Peter. Dr. med.  Witczak, Elke (FPI) | Klinische Forschung Dresden GmbH, Prager Strasse 10, Dresden, Sachsen, 01069, Germany |
| Illies, Gabriele | SMO. MD, Zentrum fuer Klinische Studien , Bahrendorfer Strasse 19-20, Magdeburg, Sachsen-Anhalt, 39112, Germany |
| Linnhoff, Anneliese E. Dr. med.* | Praxis Dr. med. Anneliese Linnhoff, Hohenzollerndamm 2, Berlin, Berlin, 10717, Germany |
| Ludwig-Sengpiel, Andrea. Dr. med. | KLB Gesundheitsforschung Luebeck GmbH, Pferdemarkt 6-8, Luebeck, Schleswig-Holstein, 23552, Germany |
| Nischik, Ruth. Dr. med. | Studienambulanz, Medamed GmbH, Friedrich-Ebert-Strasse 33, Leipzig, Sachsen, 04109, Germany |
| Schenkenberger, Isabelle. MD | KFB-Klinsche Forschung Berlin, Ansbacher Strasse 17-19, Berlin, Berlin, 10787, Germany |
| Thron, Andrea. Dr. Med., MD  Mindt, Susanne. Dr. Med., MD (FPI)  Zemke, Katrin. MD (FPI) | Klinische Forschung Hamburg, Hoheluftchaussee 18, Hamburg, Hamburg, 20253, Germany |
| Tyler, Kerstin  Schaper, Lennart (FPI) | Polikum Friedenau MVZ, Marburger Strasse 12-13, Berlin, Berlin, 10789, Germany |
| Zachgo, Wolfgang. Dr. Med., MD* | Pneumologisches Forschungsinstitut Hohegeest GbR, Norderstrasse 12, Geesthacht, Schleswig-Holstein, 21502, Germany |
| **Korea** |  |
| Kim, Je-Hyeong. MD, PhD* | Korea University Ansan Hospital, Division of Pulmonary, Sleep and Critical Care Medicine, Department of Internal Medicine, 516, Gojan-1-dong, Danwon-gu, Ansan 425-707, Korea |
| Lee, ByoungJun Roh, Yong-Ho. MD, PhD (FPI) | Seoul Veterans Hospital, Internal Medicine, 6-2 Dunchon-dong Gangdong-gu, Seoul, 134060, Korea |
| Lee, Sang Haak. MD, PhD | Catholic University of Korea - St.Paul's Hospital, Department of Internal Medicine, 620-56 Jeonnong-2 dong, Dongdaemun-gu, Seoul, 137-709, Korea |
| Lee, Sung-Soon. MD, PhD* | Inje University College of Medicine, ilsan paik hospital, Department of Internal Medicine, 2240, daehwa-dong, ilsanseo-gu, goyang-si, gyeonggi-do, 411706,  Korea |
| Lee, Young-Min. MD, PhD* | Inje University Pusan Paik Hospital, Pulmonary Division, Department of Internal Medicine, 633-165 Gaegumdong Busanjingu, Pusan, 614-735, Korea |
| Lim, Sung Chul. MD, PhD* | Chonnam National University hospital, 671, jebongro, donggu, gwangju, 501757, Korea |
| Shim, Jae Jeong. MD, PhD | Korea University Guro Hospital, Pulmonary department, 148, Guro-dong gil, Guro-gu, Seoul, 152-703, Korea |
| Yoo, Jee-Hong | KyungHee East-West Neo Medical Centre, #149 Sangil-dong, Gangdong-gu, Seoul, 134-090, Korea |
| **Norway** |  |
| Elle, Sigbjørn. MD* | Medi 3 Innlandet AS, avd. Elverum, Helge Veringsaasensvei 14, Elverum, N-2408, Norway |
| Karlsson, Thomas. MD* | Postgården Legesenter, Trondheimsveien 84, Kløfta, 2040, Norway |
| Norheim, Paal | Forusakutten AS, Avd. for Oppdragsforskning, St. Olavsgt. 2, Stavanger, 4005, Norway |
| Sirnes, Per. MD, PhD* | Østlandske Hjertesenter, Prinsensgate 7, Moss, 1501, Pb. 98, 1501, Norway |
| **Philippines** |  |
| De Guia, Teresita S. MD, FPCP | Philippine Heart Center, Division of Pulmonary and Critical Care, East Avenue, Diliman Quezon City, 1100, Philippines |
| Germar, Arnold G. MD, FPCP | The Medical City, Ortigas Avenue, Pasig City, 1600, Philippines |
| Jorge II, Manuel C. MD | Philippine General Hospital, Pulmonary Department, Taft Avenue, Manila, 1000, Philippines |
| Maliwat-Galapon, Araceli M. MD, FPCP | St. Michael Family Hospital, Poblacion II, Marilao, Bulacan, 3019, Philippines |
| Mendoza-Wi, Jennifer Ann. MD | Dagupan Doctors Villaflor Memorial Hospital, Mayombo District, Dagupan City, 2400, Philippines |
| Tindog-Isidro, Marie Grace Dawn. MD, FPCP | West Visayas State University Medical Center, E. Lopez Street, Jaro, Iloilo City, 5000, Philippines |
| **Thailand** |  |
| Boonsawat, Watchara. MD, PhD | Srinagarind Hospital, Division of Pulmonary Medicine, Department of Medicine, Khon Kaen University, 123 Mitraphap, Nueng, Khon Kaen, 40002, Thailand |
| Chuaychoo, Benjamas. MD, PhD | Siriraj Hospital, Mahidol University, Department of Internal Medicine, Faculty of Medicine, Division of Respiratory Diseases and Tuberculosis, 2 Prannok Road, Bangkoknoi, Bangkok, 10700, Thailand |
| Kiatboonsri, Sumalee. MD | Ramathibodi Hospital, Pulmonary and Critical Care Division, Department of Medicine, Sririkit Floor 3, 270 Rama VI Road, Bangkok, 10400, Thailand |
| Pipatvech, Kanok. MD, PhD | Nan Hospital, 1 Worawichai Road, Nan Province, 55000, Thailand |
| Pothirat, Chaicharn. MD | Maharajnakorn Chiangmai Hospital, Division of Pulmonary, Critical Care and Allergy, Department of Internal medicine, Faculty of Medicine, 110 Intawaroros Road, Muang, ChiangMai, 50200, Thailand |
| Sangsayunh, Piamlarp. MD | Central Chest Institute of Thailand, Division of Respiratory Medicine, 39 Tiwanon Road, Amphur Muang, Nonthaburi, 11000, Thailand |
| Suntrapiwat, Kajorn. MD | Buddhachinaraj Hospital, Department of Internal medicine, 90 Srithamapidok Road, Muang, Pitsanuloke, 65000, Thailand |
| **United States** |  |
| Alleyne, II, William F. MD, FCCP | CU Pharmaceutical Research, Suite 115, 223 South Herlong Avenue, Rock Hill, South Carolina, 29732, United States |
| Boscia, III, Joseph A. MD, FCCP, CPI | CU Pharmaceutical Research, 1005 Thompson Boulevard, Union, South Carolina, 29379, United States |
| Chandran, Ravi T. MD | Hope Pharmaceutical Research, Suites C & D, 959 Bypass 123, Seneca, South Carolina, 29678, United States |
| Cole, Jeremy. MD | IPS Research Company, 1111 North Lee, Suite 400, Oklahoma City, Oklahoma, 73103, United States |
| Condit, Jonathan. DO | American Health Network of Indiana, LLC, 3631 Morrison Road, Muncie, Indiana, 47304-5547, United States |
| Covelli, Henry D. MD | Pulmonary Consultants, Suite 300, 700 Ironwood Drive, Coeur D'Alene, Idaho, 83814, United States |
| Cruz, Humberto. DO | Florida Institure for Clincal Research, LLC, Suite 117, 10967 Lake UnderHill Road, Orlando, Florida, 32825, United States |
| Cullen, Edward Clark. MD | Sunstone Medical Research, LLC, 1904 East Barnett Road, Medford, Oregon, 97504, United States |
| Dransfield, Mark T. MD | University of Albama at Birmingham Lung Health Center, 526 20th Street South, Birmingham, Alabama, 35294, United States |
| Erb, David R. MD, CPI | Gaffney Pharmaceutical Research, 1529 North Limestone Street, Gaffney, South Carolina, 29340, United States |
| Fakih, Faisal A. MD | Florida Pulmonary Research Center, Suite B, 1788 West Fairbanks Avenue, Winter Park, Florida, 32789, United States |
| Feldman, Gregory J. MD, CPI | South Carolina Pharmaceutical Research, 141 Harold Fleming Court, Spartanburg, South Carolina, 29303, United States |
| Gotfried, Mark H. BS, MD | Pulmonary Associates, PA, 1112 East McDowell Road, Phoenix, Arizona, 85006, United States |
| Hill, John M. MD, RRT, CPI | Avail Clinical Research, LLC, 860 Peachwood Drive, DeLand, Florida, 32720, United States |
| Hyers, Thomas M. MD | CARE Clinical Research, Suite 350, 522 North New Ballas Road, Saint Louis, Missouri, 63141, United States |
| Johnson Jr., Frank Paul. MD | MultiSpecialty Clinical Research, 3201Bristol Highway, Suite 7, Johnson City, Tennessee, 37601, United States |
| Jones, Stephen Watson. MD | Boiling Springs Medical Research, 327-B West College Avenue, Shelby, North Carolina, 28152, United States |
| Kaplan, Adolfo E. MD, FCCP* | Pulmonary and Sleep Center of the Valley, Suite 303, 2821 Michaelangelo Drive, Edinburg, Texas, 78539, United States |
| Kaplan, Larry (Lawrence) D. MD | Duluth BioMedical Research, LLC, 3500 Duluth Park Lane, Duluth, Georgia, 30096, United States |
| Klein, Ryan M. MD, FCCP | Southern California Clinical Trials, Inc., Suite 111 and 311, 1501 Superior Avenue, Newport Beach, California, 92663, United States |
| Korenblat, Phillip E. MD, CPI | The Clinical Research Center, LLC, Suite 112, 1040 North Mason Road, St. Louis, Missouri, 63141, United States |
| Koser, Andras. MD, CCPI* | Palmetto Medical Research Associates, LLC, 201 South B Street, Easley, South Carolina, 29640, United States |
| Magee, Shawn M. MD | Cotton O'Neil Clinical Research Center, Suite 240, 823 South West Mulvane Street, Topeka, Kansas, 66606, United States |
| Nussdorfer, Thomas C. MD | Medical Research Associates At the Walk In Clinic, 3074 N US 31 South, Traverse City, Michigan, 49684, United States |
| Prochnau, Jay J. MD | Indiana University Health Arnett, Inc., 1500 Salem Street, Lafayette, Indiana, 47904, United States |
| Pudi, Krishna K. MD | Upstate Pharmaceutical Research, 30 Pointe Circle, Greenville, South Carolina, 29615, United States |
| Pudi, Krishna K. MD | Upstate Pharmaceutical Research, 201 Richard Street, Easley, South Carolina, 29640, United States |
| Robinette, Jr., Emory H. MD* | Pulmonary Research of Abingdon, 223 East Valley Street, Abingdon, Virginia, 24210, United States |
| Sciurba, Frank C. MD | University of Pittsburgh Medical Center, Emphysema COPD Research Center, Suite 1211, Kaufmann Medical Building, 3471 Fifth Avenue, Pittsburgh, Pennsylvania, 15213, United States |
| Shah, Amit G. MD | Piedmont Research Partners, LLC, Suite 1600, 9789 Charlotte Highway., Fort Mill, South Carolina, 29707, United States |
| Sigal, Barry W. MD, FCCP | Southeastern Research Center, LLC, 3019 Lyndhurst Avenue, Winston-Salem, North Carolina, 27103, United States |
| Siler, Thomas M. MD | Midwest Chest Consultants, PC, Suite 470, 330 First Capital Drive, St. Charles, Missouri, 63301, United States |
| Sinkowitz, Deren M. MD | Peninsula Pulmonary Medical Associates, Suite 180, 23550 Hawthorne Boulevard, Torrance, California, 90505, United States |
| Spangenthal, Selwyn. MD | American Health Research, Inc., 1918 Randolph Road, Suite 440, Charlotte, North Carolina, 28207, United States |
| Sriram, Peruvemba S. MD | North Florida / South Georgia Veterans Health System, Malcom Randall VAMC, 1601 South West Archer Road, 151, Room-E588-1, Gainesville, Florida, 32608, United States |
| Stegemoller, Ronald K. MD | American Health Network of IN LLC, Avon Clinical Research Department, Suite 645, 5250 East US 36, Avon, Indiana, 46123, United States |
| Torres II, Diego T. MD | Ribo Research LLC, Peninsula Research Inc., Suite 250, 305 Clyde Morris Boulevard, Ormond Beach, Florida, 32174, United States |
| Zeno, Brian R. MD | Remington-Davis Clinical Research, Inc., Suite 106 A, 1335 Dublin Road, Columbus, Ohio, 43215, United States |

* No Subjects Randomised. All centres participated in the study under the US IND.

**Supplemental Figure S1**. Kaplan−Meier survival curves for moderate-to-severe AECOPD by IMRS tertile. AECOPD = acute exacerbation of chronic obstructive pulmonary disease.


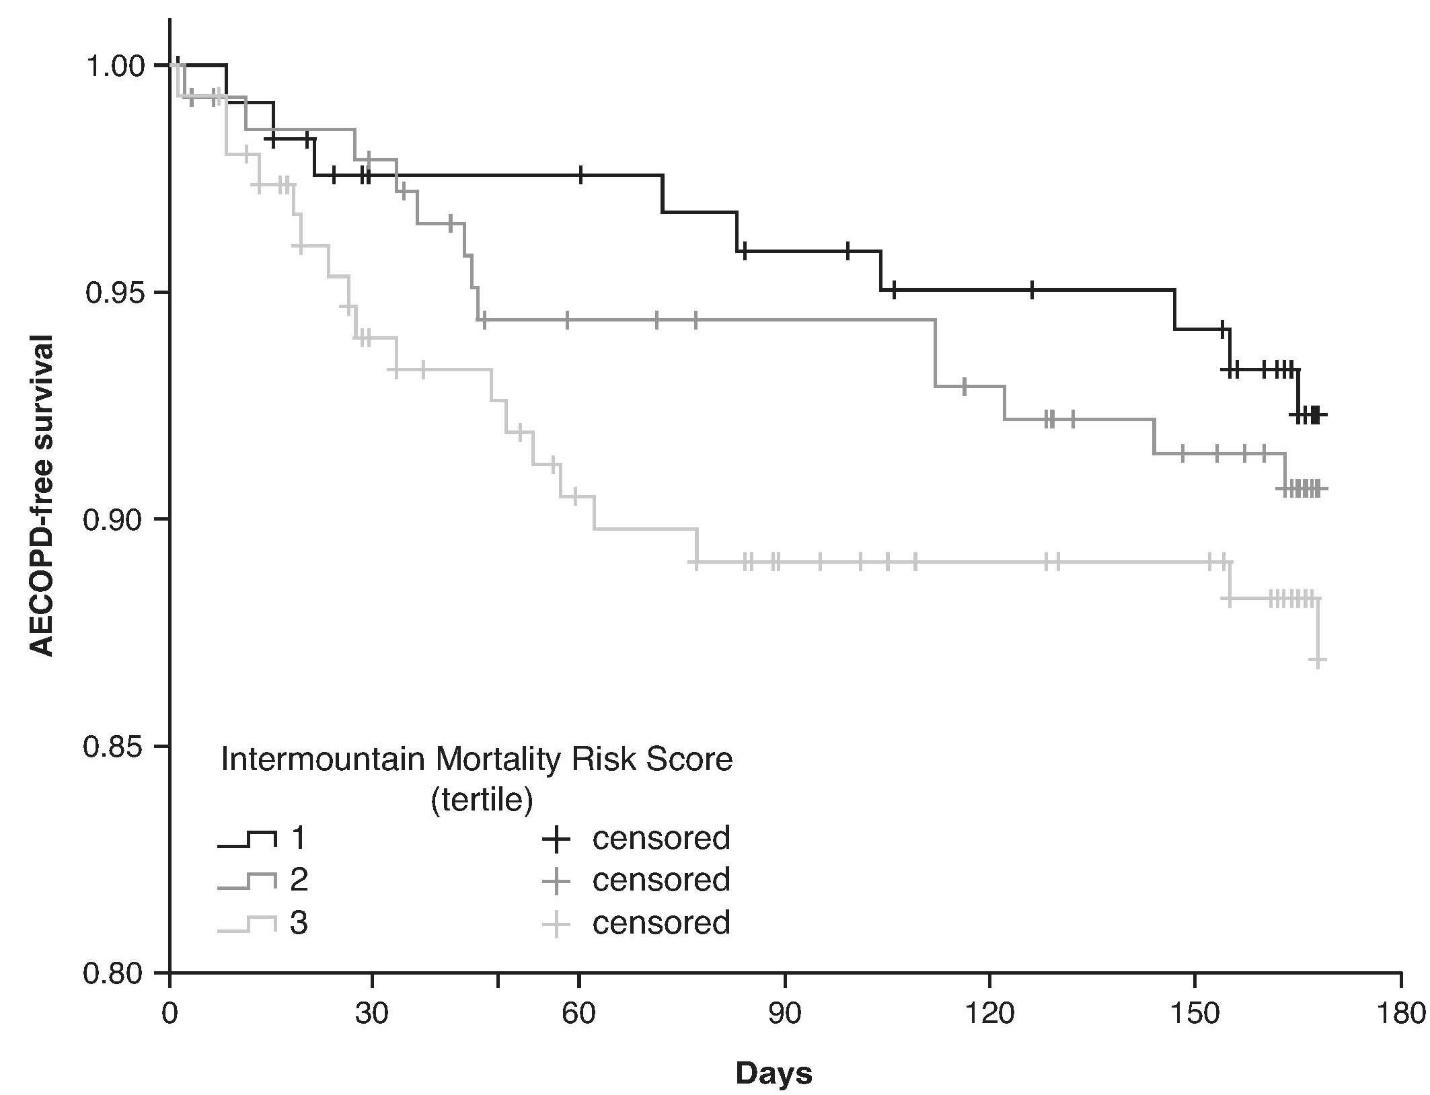


**Supplemental Figure S2**. Kaplan−Meier survival curves for CV event by IMRS tertile. CV = cardiovascular. CV event includes any of the following: myocardial infarction, unstable angina, stroke, transient ischemic attack, or CV mortality.


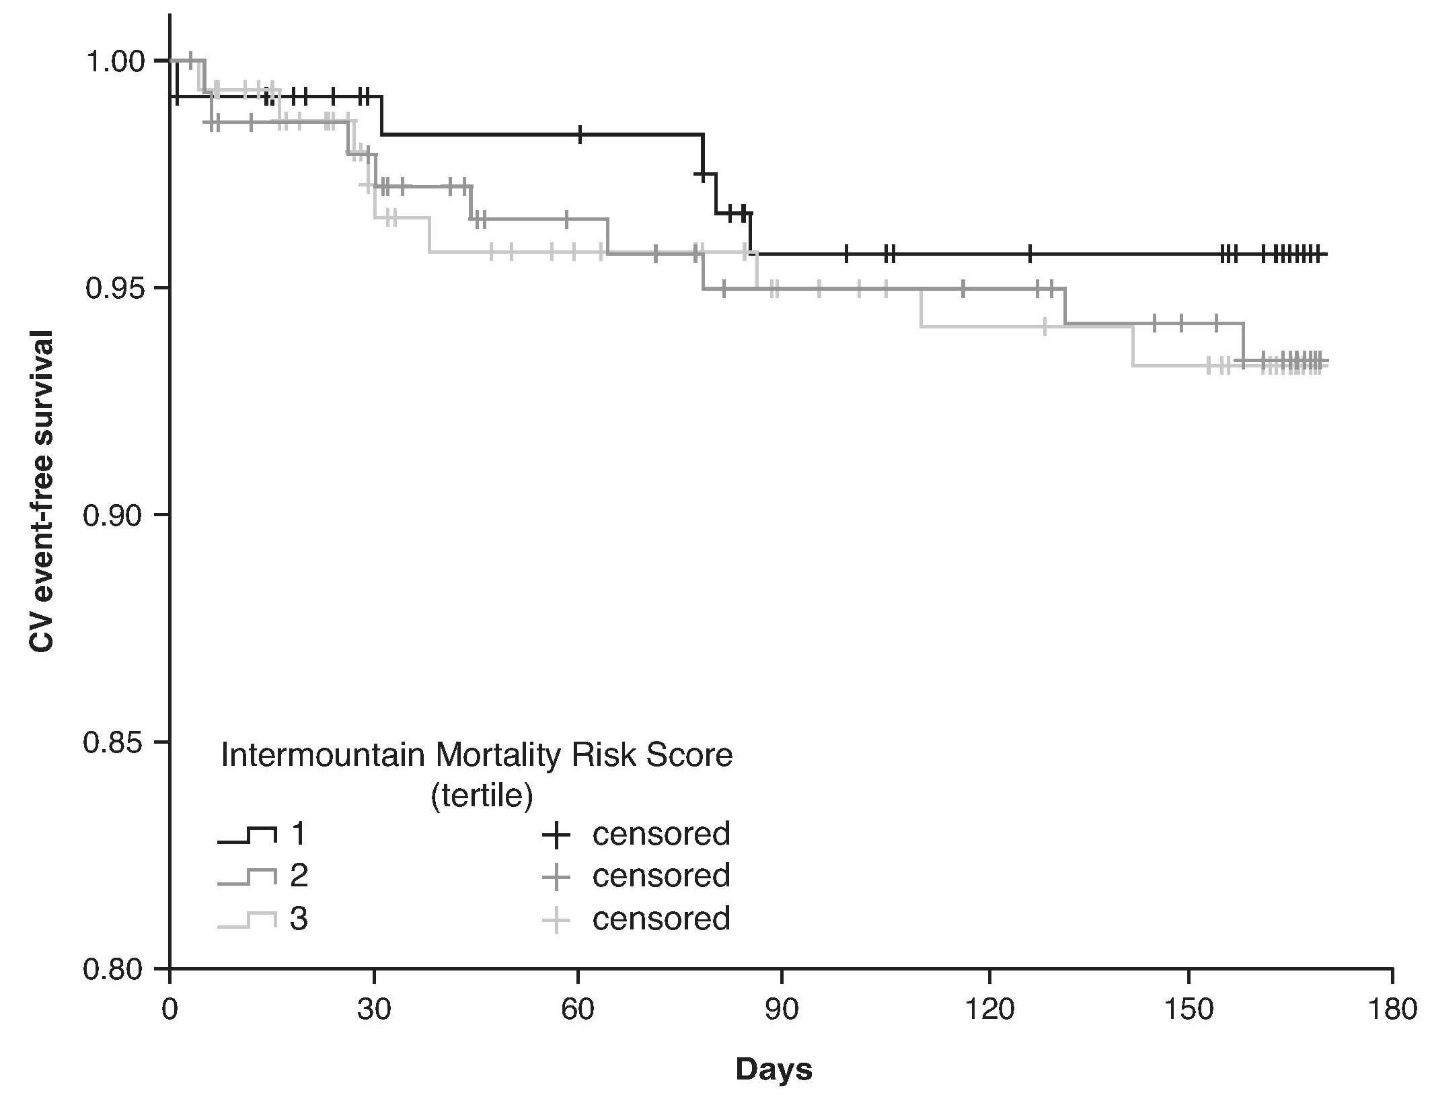

Supplement: Supplementary file 1 [file get_supplementary_file.php]
